# Supplementary material for: Immune resilience despite inflammatory stress promotes longevity and favorable health outcomes including resistance to infection
Source: PubMed Central journal article supplement (PMC10264401; doi:10.1038/s41467-023-38238-6), 2023-06-13
Supplement: 41467_2023_38238_MOESM3_ESM.pdf [file 41467_2023_38238_MOESM3_ESM.pdf]

## Description of Additional Supplementary Data Files

### **Supplementary Data 1.** Cohorts/datasets and surveys.

- a. Summary of cohorts/datasets evaluated.
- b. Summary of literature survey performed.

### **Supplementary Data 2.** Baseline characteristics of study participants from HIV- and HIV+ cohorts

### **Supplementary Data 3.** CD4+ and CD8+ T-cell counts and CD4:CD8 T-cell ratio by IHG status in HIV- cohorts.

### **Supplementary Data 4.** Characteristics of the female sex workers (FSWs)

- a. 762 HIV- FSWs.
- b. 449 HIV- FSWs.

### **Supplementary Data 5.** Baseline characteristics of renal transplant recipients (RTRs).

### **Supplementary Data 6.** Characteristics of study participants from the HIV+ cohorts

### **Supplementary Data 7.** COVID-19 cohort characteristics by baseline IHG status.

### **Supplementary Data 8.** Associations of behavioral activity score (BAS), total STI score and IHGs with risk of HIV seroconversion in HIV- FSWs.

- a. With IHG in 449 HIV- FSWs
- b. With IHG subgrades in 762 HIV- FSWs

### **Supplementary Data 9.** Mortality HRs in COVID-19 cohort and FHS offspring cohort

- a. Hazard models of the COVID-19 BP-GO term signature scores in the COVID-19 and FHS cohorts
- b. SAS and MAS gene signatures: GO terms and overlap of genes
- c. Hazard models of SAS, MAS, and IMM-AGE gene signatures in the COVID-19 and FHS cohorts
- d. Single hazard model of the MAS and SAS signature scores.
- e. Hazard models of SAS-1/MAS-1 profiles in the FHS Cohort

### **Supplementary Data 10.** Correlation of genes in gene signature scores (SAS-1, MAS-1, and IMM-AGE) with three immunological markers in 56 HIV+ patients on ART.

### **Supplementary Data 11.** Immunological associations in non-human primates.

### **Supplementary Data 12.** Seventy-five immune markers examined in the SardiNIA cohort and their association with IHG-III or IHG-IV and/or age or neither (neutral)

### **Supplementary Data 13.** Analysis of gene expression datasets.

- a. Characteristics, sources, platform information and normalization performed in all gene expression datasets evaluated in the current study.
- b. Gene representation of SAS-1, MAS-1, and IMM-AGE gene signature in all the datasets evaluated in the current study.
- c. Sources for data access to various cohorts used in the current study.

### **Supplementary Data 14.**

- a. Exact *P* values per figure panel.
- b. Exact *P* values for figure panel 5c.
